# Supplementary material for: Synthesis and crystal structure of Fe[SeO4]OH and prediction of polytypes in the extended R[MO4]Z family
Source: Royal Society of Chemistry journal article supplement (doi:10.1039/d2ce01533a), 2023-01-01
Supplement: d2ce01533a1.pdf [file d2ce01533a1.pdf]

## Supporting information

# Synthesis, Crystal Structure of Fe[SeO<sub>4</sub>]OH and Prediction of Polytypes in the extended $R[MO_4]Z$ Family

Alla Arakcheeva,<sup>\*a,b</sup> Noémie Maamouri,<sup>a</sup> Wen Hua Bi,<sup>a</sup> Benoît Truc,<sup>c</sup> and Arnaud Magrez<sup>a</sup>

<sup>a</sup> Ecole Polytechnique Fédérale de Lausanne, SB, IPHYS, Crystal Growth Facility, Lausanne 1015, Switzerland. E-mail: [alla.arakcheeva@epfl.ch](mailto:alla.arakcheeva@epfl.ch), [arnaud.magrez@epfl.ch](mailto:arnaud.magrez@epfl.ch)

<sup>b</sup> Phase Solutions Co Ltd, ch. des Mesanges 7, Lausanne 1012, Switzerland.

<sup>c</sup> Ecole Polytechnique Fédérale de Lausanne, SB, IPHYS, Laboratory for Ultrafast Microscopy and Electron Scattering, Lausanne 1015, Switzerland

Corresponding email: [alla.arakcheeva@epfl.ch](mailto:alla.arakcheeva@epfl.ch)

**Table of Contents:**

Polytypes generation using superspace approach. Input files for *JANA2006* software. .... 3

Sketch of structures formed by  $L_{ss}$ -layers, similar to  $\text{Fe}[\text{MO}_4]\text{OH}$ , ( $M = \text{S}, \text{Se}$ ).....4

Detailed characteristics of atomic positions for compounds, which can be assigned to the **1M** polytype. Comparison of predicted and experimental data.....5

Detailed characteristics of atomic positions for compounds, which can be assigned to the **1O** polytype. ....5

Polytypes generation using superspace approach. Input files for JANA2006 software

```

.m40
10 0 0 1 0
1.000000 0.000000 0.000000 0.000000 0.000000 0.000000 100000
0.000000 0.000000 0.000000 0.000000 0.000000 0.000000 000
0.000000 0.000000 0.000000 0.000000 0.000000 0.000000 000000
0.000000 0.000000 0.000000 0.000000 0.000000 0.000000 000000
Fe 1 1 0.500000 0.127000-0.250000 0.750000 000 0 0 0
0.030000 0.000000 0.000000 0.000000 0.000000 0.000000 0101100000
O1 3 1 1.000000 0.125000-0.253000 0.433000 000 0 0 0
0.000000 0.000000 0.000000 0.000000 0.000000 0.000000 0000000000
O2 3 1 0.500000 0.288000-0.017000 0.250000 100 1 0 0
0.030000 0.000000 0.000000 0.000000 0.000000 0.000000 0000000000
τ → 0.500000 0.000000 0
0.000000 0.000000 00
0.000000 0.000000 0
O2a 3 1 0.500000 0.288000 0.517000 0.250000 100 1 0 0
0.030000 0.000000 0.000000 0.000000 0.000000 0.000000 0000000000
1-τ → 0.500000 0
0.500000 0.000000 00
0.000000 0.000000 0
O3 3 1 0.500000-0.042000-0.018000 0.250000 100 1 0 0
0.030000 0.000000 0.000000 0.000000 0.000000 0.000000 0000000000
τ → 0.500000 0
0.000000 0.000000 00
0.000000 0.000000 0
O3a 3 1 0.500000-0.042000 0.518000 0.250000 100 1 0 0
0.030000 0.000000 0.000000 0.000000 0.000000 0.000000 0000000000
1-τ → 0.500000 0
0.500000 0.000000 00
0.000000 0.000000 0
Se 2 1 0.500000 0.124000 0.867000 0.250000 100 1 0 0
0.030000 0.000000 0.000000 0.000000 0.000000 0.000000 0000000000
τ → 0.500000 0
0.000000 0.000000 00
0.000000 0.000000 0
Sea 2 1 0.500000 0.124000 0.633000 0.250000 100 1 0 0
0.030000 0.000000 0.000000 0.000000 0.000000 0.000000 0000000000
1-τ → 0.500000 0
0.500000 0.000000 00
0.000000 0.000000 0
O4 3 1 0.500000-0.126000-0.341000 0.750000 100 1 0 0
0.030000 0.000000 0.000000 0.000000 0.000000 0.000000 0000000000
τ → 0.500000 0
0.000000 0.000000 00
0.000000 0.000000 0
O4a 3 1 0.500000-0.126000 0.841000 0.750000 100 1 0 0
0.030000 0.000000 0.000000 0.000000 0.000000 0.000000 0000000000
1-τ → 0.500000 0
0.500000 0.000000 00
0.000000 0.000000 0

```

```

.m50
Version Jana2006
title
cell 7.589 7.259 6.562 90 90 90
esdcell 0.03 0.04 0.04 0 0 0
ndim 4 ncomp 1
qi 0 0 0.5 → q = γc* = 1/2 c*
qr 0 0 0
spgroup Pnam(00g)000 62 3
lattice P
symmetry x1 x2 x3 x4
symmetry -x1 -x2 x3+1/2 x4
symmetry -x1+1/2 x2+1/2 -x3 -x4
symmetry x1+1/2 -x2+1/2 -x3+1/2 -x4
symmetry -x1 -x2 -x3 -x4
symmetry x1 x2 -x3+1/2 -x4
symmetry x1+1/2 -x2+1/2 x3 x4
symmetry -x1+1/2 x2+1/2 x3+1/2 x4
unitsnumb 4
atlist Fe S O5 H0
format -62
atom Fe atradius 1.26 color 181113000
atom S atradius 1.04 color 255250000
atom O atradius 0.74 color 254003000
atom H atradius 0.46 color 255204204
comen 1 0 -2
comen 0 1 0
comen 1 0 0
tzero 0 → t0
lambda 0.71075 radtype 1 lpfactor 1
monangle 6.0823 perfmono 0.5
nalpna 2 kalpna1 0.709317 kalpna2 0.713607 kalpna 0.499
roundmethod 1
end

```

Figure S1. Input files used with the JANA2006 software<sup>32</sup> to generate Fe[MO4]OH (M = S, Se) polytypes from the average structure. Variable parameters,  $\gamma$  in the modulation vector  $\mathbf{q} = \gamma\mathbf{c}^*$ ,  $t_0$ -cut in the  $x_4$  axis, and occupancy parameter  $\tau$ , are shown by red arrows. Note that parameter  $\tau$  equal to  $\Delta x_4$  is the JANA2006 software.

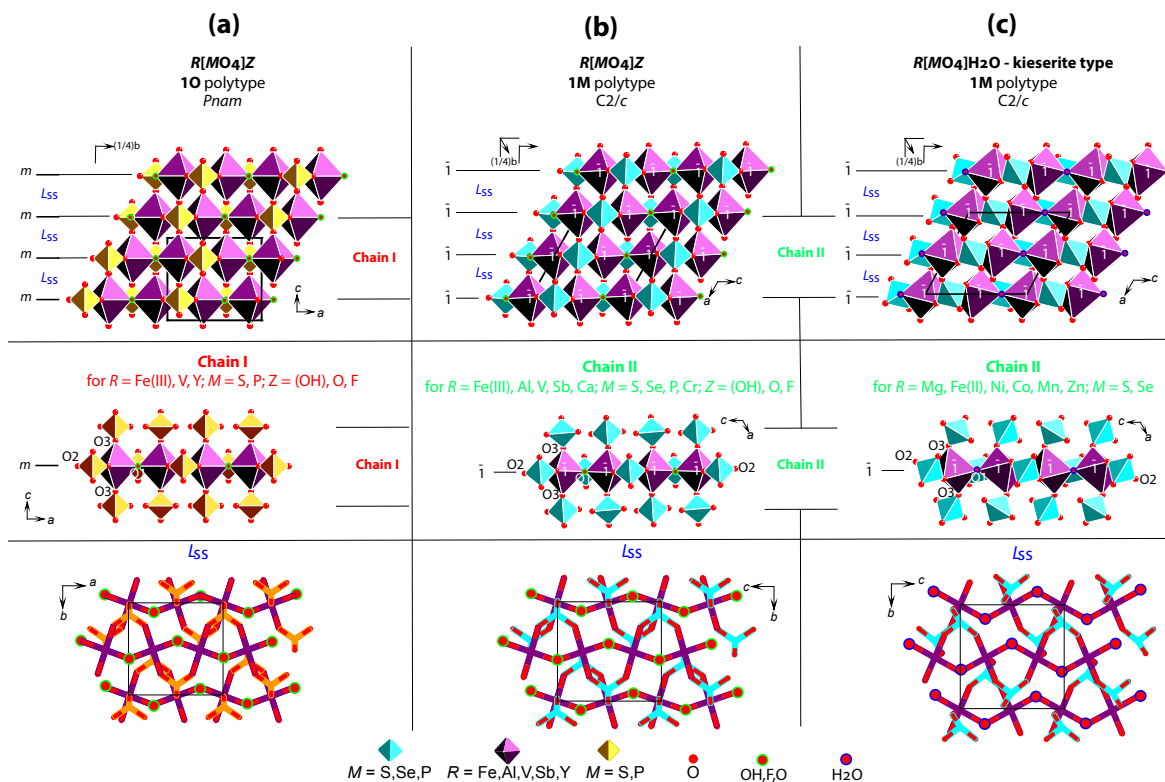

**Figure S2.** Sketch of structures formed by *L*-layers, similar to  $Fe[MO_4]OH$  ( $M = S, Se$ ). Panel **(a)**:  $\beta$ - $V[SO_4]O$ ,<sup>16</sup>  $Y[SO_4]F^{25}$  and  $V[HPO_4]O^{30}$  structure types with the space group *Pnam* can be attributed to **10** ( $m, \dots$ ) polytype. Panel **(b)**: structure types  $Fe^{III}[SO_4]F$ ,<sup>21,22</sup>  $CaCrF_5$  ( $= Ca[CrF_4]F$ ),<sup>23,24</sup> and  $Al[SO_4]OH^{20}$  with space group *C2/c* can be identified with **1M** ( $\bar{1}, \dots$ ) polytype. Panel **(c)**: the kieserite structure type with the general formula  $R^{II}[MO_4]H_2O$  ( $R = Mg, Fe, Ni, Co, Mn, Zn; M = S, Se, As$ ) can also be assigned to **1M** polytype, since  $H_2O$  molecules are at least and deform the structure, but do not change the space group and atomic sites of this polytype. The symmetry elements are shown in terms internationally accepted by IUCr.

Table S1. Experimental atomic parameters for  $R[MO_4]Z$  in comparison to the predicted for the **1M** polytype (Space group  $C2/c$ ;  $a \approx c \approx 7.5 \pm 0.3 \text{ \AA}$ ,  $b \approx 7.2 \pm 0.2 \text{ \AA}$ ,  $\beta \approx 120.0^\circ$ ). Wyckoff symbol, coordinates and site symmetry indicated in square brackets for the  $R$ ,  $M$ ,  $Z$  and  $O$  sites.

| Compound                                             | Variable positional parameters of atoms |                                     |                                            |                                                           | 3D structure type                                                 | Reference    |
|------------------------------------------------------|-----------------------------------------|-------------------------------------|--------------------------------------------|-----------------------------------------------------------|-------------------------------------------------------------------|--------------|
|                                                      | $R$<br>[4a (0 0 0); $\bar{1}$ ]         | $M$<br>[4e (0 y $\frac{1}{4}$ ); 2] | $Z$<br>[4e (0 y $\frac{1}{4}$ ); 2]        | $O$<br>[8f (x, y, z); 1]                                  |                                                                   |              |
| $R[MO_4]Z$<br>Predicted                              | $R$                                     | $M$<br>$y = 0.616$                  | $Z$<br>$y = 0.095$                         | O1: <b>0, 0.733, 0.0840</b><br>O2: <b>0.683, 0, 0.842</b> | <b>1M</b> polytype<br>(kieserite-like)                            | Present work |
| Fe(SeO <sub>4</sub> )(OH)                            | Fe <sup>III</sup>                       | Se <sup>VI</sup><br>$y = 0.613$     | O <sub>OH</sub><br>$y = 0.091$             | O1: 0, 0.736, 0.0645<br>O2: 0.693, 0.025, 0.8382          | <b>1M</b> polytype<br>(kieserite-like)                            | Present work |
| Fe(SO <sub>4</sub> )(OH)                             | Fe <sup>III</sup>                       | S <sup>VI</sup><br>$y = 0.615$      | O <sub>OH</sub><br>$y = 0.097$             | O1: -0.010, 0.736, 0.0817<br>O2: 0.684, 0.008, 0.8460     | Fe(SO <sub>4</sub> )(OH)<br>(kieserite-like)                      | [14]         |
| Fe(SO <sub>4</sub> )H <sub>2</sub> O                 | Fe <sup>II</sup>                        | S <sup>VI</sup><br>$y = 0.653$      | O <sub>H<sub>2</sub>O</sub><br>$y = 0.144$ | O1: 0.096, 0.768, 0.156<br>O2: 0.670, -0.044, 0.8985      | Mg(SO <sub>4</sub> )H <sub>2</sub> O<br>(kieserite)               | [8]          |
| Ni(SeO <sub>4</sub> )H <sub>2</sub> O                | Ni <sup>II</sup>                        | Se <sup>VI</sup><br>$y = 0.662$     | O <sub>H<sub>2</sub>O</sub><br>$y = 0.127$ | O1: 0.112, 0.781, 0.150<br>O2: 0.685, -0.047, 0.922       | Mg(SO <sub>4</sub> )H <sub>2</sub> O<br>(kieserite)               | [12, 13]     |
| Fe(SeO <sub>4</sub> )H <sub>2</sub> O<br>(simulated) | Fe <sup>II</sup>                        | Se <sup>VI</sup><br>$y = 0.665$     | O <sub>H<sub>2</sub>O</sub><br>$y = 0.135$ | O1: 0.118, 0.777, 0.153<br>O2: 0.682, -0.047, 0.912       | Mg(SO <sub>4</sub> )H <sub>2</sub> O<br>(kieserite)               | [11]         |
| Al(SO <sub>4</sub> )(OH)                             | Al <sup>III</sup>                       | S <sup>VI</sup><br>$y = 0.623$      | O <sub>OH</sub><br>$y = 0.086$             | O1: 0.004, 0.743, 0.0800<br>O2: 0.688, 0.003, 0.8465      | Al(SO <sub>4</sub> )(OH)<br>(kieserite-like)                      | [20]         |
| Fe(SO <sub>4</sub> )F                                | Fe <sup>III</sup>                       | S <sup>VI</sup><br>$y = 0.603$      | F<br>$y = 0.083$                           | O1: -0.004, 0.734, 0.0840<br>O2: 0.684, 0.014, 0.8460     | Fe(SO <sub>4</sub> )F<br>(kieserite-like)                         | [21,22]      |
| V(PO <sub>4</sub> )F                                 | V <sup>IV</sup>                         | P <sup>V</sup><br>$y = 0.625$       | F<br>$y = 0.082$                           | O1: -0.006, 0.746, 0.0750<br>O2: 0.701, -0.002, 0.8460    | Fe(SO <sub>4</sub> )F<br>(kieserite-like)                         | [22]         |
| Sb(PO <sub>4</sub> )O                                | Sb <sup>V</sup>                         | P <sup>V</sup><br>$y = 0.665$       | O<br>$y = 0.089$                           | O1: 0.088, 0.775, 0.1250<br>O2: 0.685, -0.056, 0.9010     | CaCrF <sub>5</sub> (= Ca(CrF <sub>4</sub> )F)<br>(kieserite-like) | [23,24]      |

Table S2. Experimental atomic parameters for  $R[MO_4]Z$  for the **1O** polytype (Space group  $Pnma$ ;  $a \approx 7.5 \pm 0.3 \text{ \AA}$ ,  $b = 0.5a\sqrt{3} \approx 6.5 \pm 0.3 \text{ \AA}$ ,  $c \approx 7.2 \pm 0.2 \text{ \AA}$ ). Wyckoff symbol, coordinates and site symmetry indicated in square brackets for the  $R$ ,  $M$ ,  $Z$  and  $O$  sites.

| Compound                           | Variable positional parameters of atoms   |                                           |                                           |                                                                                                                  | 3D Structure type                             | Reference |
|------------------------------------|-------------------------------------------|-------------------------------------------|-------------------------------------------|------------------------------------------------------------------------------------------------------------------|-----------------------------------------------|-----------|
|                                    | $R$<br>[4c (x, $\frac{1}{4}$ , z); $m.$ ] | $M$<br>[4c (x, $\frac{1}{4}$ , z); $m.$ ] | $Z$<br>[4c (x, $\frac{1}{4}$ , z); $m.$ ] | $O$<br>O1: [8d (x, y, z); 1]<br>O3: [4c (x, $\frac{1}{4}$ , z); $m.$ ]<br>O4: [4c (x, $\frac{1}{4}$ , z); $m.$ ] |                                               |           |
| V(SO <sub>4</sub> )O<br>Pauflerite | V <sup>IV</sup><br>$x=0.335, z=0.267$     | S <sup>VI</sup><br>$x=0.123, z=0.868$     | O<br>$x=0.626, z=0.168$                   | O1: 0.375, 0.563, 0.243<br>O3: $x=0.955, z=-0.019$<br>O4: $x=0.284, z=-0.010$                                    | $\beta$ -VO(SO <sub>4</sub> )<br>(pauflerite) | [16]      |
| Fe(SO <sub>4</sub> )(OH)           | Fe <sup>III</sup><br>$x=0.375, z=0.25$    | S <sup>VI</sup><br>$x=0.125, z=0.866$     | O <sub>OH</sub><br>$x=0.625, z=0.155$     | O1: 0.375, 0.567, 0.25<br>O3: $x=0.959, z=-0.017$<br>O4: $x=0.291, z=-0.017$                                     | $\beta$ -VO(SO <sub>4</sub> )<br>(pauflerite) | [15]      |
| Y(SO <sub>4</sub> )F               | Y <sup>III</sup><br>$x=0.445, z=0.152$    | S <sup>VI</sup><br>$x=0.093, z=0.814$     | F<br>$x=0.706, z=0.200$                   | O1: 0.439, 0.582, 0.173<br>O3: $x=0.980, z=-0.013$<br>O4: $x=0.259, z=-0.118$                                    | Y(SO <sub>4</sub> )F<br>(pauflerite-like)     | [25]      |
| V(HPO <sub>4</sub> )O              | V <sup>IV</sup><br>$x=0.333, z=0.265$     | P <sup>V</sup><br>$x=0.123, z=0.875$      | O<br>$x=0.633, z=0.160$                   | O1: 0.373, 0.560, 0.235<br>O3: $x=0.955, z=-0.001$<br>O4: $x=0.291, z=-0.007$                                    | $\beta$ -VO(SO <sub>4</sub> )<br>(pauflerite) | [30]      |
