# Supplementary material for: Synthesis and crystal structure of Fe[SeO4]OH and prediction of polytypes in the extended R[MO4]Z family
Source: Royal Society of Chemistry journal article supplement (doi:10.1039/d2ce01533a), 2023-01-01
Supplement: d2ce01533a2.pdf [file d2ce01533a2.pdf]

# .m40

|            | 10       | 0        | 0        | 1         | 0         |          |          |          |            |
|------------|----------|----------|----------|-----------|-----------|----------|----------|----------|------------|
|            | 1.000000 | 0.000000 | 0.000000 | 0.000000  | 0.000000  | 0.000000 | 0.000000 | 0.000000 | 100000     |
|            | 0.000000 | 0.000000 | 0.000000 |           |           |          |          |          | 000        |
|            | 0.000000 | 0.000000 | 0.000000 | 0.000000  | 0.000000  | 0.000000 | 0.000000 | 0.000000 | 000000     |
|            | 0.000000 | 0.000000 | 0.000000 | 0.000000  | 0.000000  | 0.000000 | 0.000000 | 0.000000 | 000000     |
| Fe         | 1        | 1        | 0.500000 | 0.127000  | -0.250000 | 0.750000 |          |          | 000 0 0 0  |
|            | 0.030000 | 0.000000 | 0.000000 | 0.000000  | 0.000000  | 0.000000 | 0.000000 | 0.000000 | 0101100000 |
| 01         | 3        | 1        | 1.000000 | 0.125000  | -0.253000 | 0.433000 |          |          | 000 0 0 0  |
|            | 0.000000 | 0.000000 | 0.000000 | 0.000000  | 0.000000  | 0.000000 | 0.000000 | 0.000000 | 0000000000 |
| 02         | 3        | 1        | 0.500000 | 0.288000  | -0.017000 | 0.250000 |          |          | 100 1 0 0  |
|            | 0.030000 | 0.000000 | 0.000000 | 0.000000  | 0.000000  | 0.000000 | 0.000000 | 0.000000 | 0000000000 |
| $\tau$     | 0.500000 |          |          |           |           |          |          |          | 0          |
|            | 0.000000 | 0.000000 |          |           |           |          |          |          | 00         |
|            | 0.000000 |          |          |           |           |          |          |          | 0          |
| 02a        | 3        | 1        | 0.500000 | 0.288000  | 0.517000  | 0.250000 |          |          | 100 1 0 0  |
|            | 0.030000 | 0.000000 | 0.000000 | 0.000000  | 0.000000  | 0.000000 | 0.000000 | 0.000000 | 0000000000 |
| $1 - \tau$ | 0.500000 |          |          |           |           |          |          |          | 0          |
|            | 0.500000 | 0.000000 |          |           |           |          |          |          | 00         |
|            | 0.000000 |          |          |           |           |          |          |          | 0          |
| 03         | 3        | 1        | 0.500000 | -0.042000 | -0.018000 | 0.250000 |          |          | 100 1 0 0  |
|            | 0.030000 | 0.000000 | 0.000000 | 0.000000  | 0.000000  | 0.000000 | 0.000000 | 0.000000 | 0000000000 |
| $\tau$     | 0.500000 |          |          |           |           |          |          |          | 0          |
|            | 0.000000 | 0.000000 |          |           |           |          |          |          | 00         |
|            | 0.000000 |          |          |           |           |          |          |          | 0          |
| 03a        | 3        | 1        | 0.500000 | -0.042000 | 0.518000  | 0.250000 |          |          | 100 1 0 0  |
|            | 0.030000 | 0.000000 | 0.000000 | 0.000000  | 0.000000  | 0.000000 | 0.000000 | 0.000000 | 0000000000 |
| $1 - \tau$ | 0.500000 |          |          |           |           |          |          |          | 0          |
|            | 0.500000 | 0.000000 |          |           |           |          |          |          | 00         |
|            | 0.000000 |          |          |           |           |          |          |          | 0          |
| Se         | 2        | 1        | 0.500000 | 0.124000  | 0.867000  | 0.250000 |          |          | 100 1 0 0  |
|            | 0.030000 | 0.000000 | 0.000000 | 0.000000  | 0.000000  | 0.000000 | 0.000000 | 0.000000 | 0000000000 |
| $\tau$     | 0.500000 |          |          |           |           |          |          |          | 0          |
|            | 0.000000 | 0.000000 |          |           |           |          |          |          | 00         |
|            | 0.000000 |          |          |           |           |          |          |          | 0          |
| Sea        | 2        | 1        | 0.500000 | 0.124000  | 0.633000  | 0.250000 |          |          | 100 1 0 0  |
|            | 0.030000 | 0.000000 | 0.000000 | 0.000000  | 0.000000  | 0.000000 | 0.000000 | 0.000000 | 0000000000 |
| $1 - \tau$ | 0.500000 |          |          |           |           |          |          |          | 0          |
|            | 0.500000 | 0.000000 |          |           |           |          |          |          | 00         |
|            | 0.000000 |          |          |           |           |          |          |          | 0          |
| 04         | 3        | 1        | 0.500000 | -0.126000 | -0.341000 | 0.750000 |          |          | 100 1 0 0  |
|            | 0.030000 | 0.000000 | 0.000000 | 0.000000  | 0.000000  | 0.000000 | 0.000000 | 0.000000 | 0000000000 |
| $\tau$     | 0.500000 |          |          |           |           |          |          |          | 0          |
|            | 0.000000 | 0.000000 |          |           |           |          |          |          | 00         |
|            | 0.000000 |          |          |           |           |          |          |          | 0          |
| 04a        | 3        | 1        | 0.500000 | -0.126000 | 0.841000  | 0.750000 |          |          | 100 1 0 0  |
|            | 0.030000 | 0.000000 | 0.000000 | 0.000000  | 0.000000  | 0.000000 | 0.000000 | 0.000000 | 0000000000 |
| $1 - \tau$ | 0.500000 |          |          |           |           |          |          |          | 0          |
|            | 0.500000 | 0.000000 |          |           |           |          |          |          | 00         |
|            | 0.000000 |          |          |           |           |          |          |          | 0          |

# .m50

```

Version Jana2006
title
cell 7.589 7.259 6.562 90 90 90
esdcell 0.03 0.04 0.04 0 0 0
ndim 4 ncomp 1
qi 0 0 0.5
qr 0 0 0
spgroup Pnam(00g)000 62 3
lattice P
symmetry x1 x2 x3 x4
symmetry -x1 -x2 x3+1/2 x4
symmetry -x1+1/2 x2+1/2 -x3 -x4
symmetry x1+1/2 -x2+1/2 -x3+1/2 -x4
symmetry -x1 -x2 -x3 -x4
symmetry x1 x2 -x3+1/2 -x4
symmetry x1+1/2 -x2+1/2 x3 x4
symmetry -x1+1/2 x2+1/2 x3+1/2 x4
unitsnumb 4
atlist Fe S 05 H0
formtab -62
atom Fe atradius 1.26 color 181113000
atom S atradius 1.04 color 255250000
atom O atradius 0.74 color 254003000
atom H atradius 0.46 color 255204204
comen 1 0 -2
comen 0 1 0
comen 1 0 0
tzero 0
lambda 0.71075 radtype 1 lpfactor 1
monangle 6.0823 perfmono 0.5
nalpha 2 kalpha1 0.709317 kalpha2 0.713607 kalphar 0.499
roundmethod 1
end

```

$\mathbf{q} = \gamma \mathbf{c}^* = \frac{1}{2} \mathbf{c}^*$

to
