# Supplementary figures and images for: Synthesis and crystal structure of Fe[SeO4]OH and prediction of polytypes in the extended R[MO4]Z family
Source: Royal Society of Chemistry journal article supplement (doi:10.1039/d2ce01533a), 2023-01-01

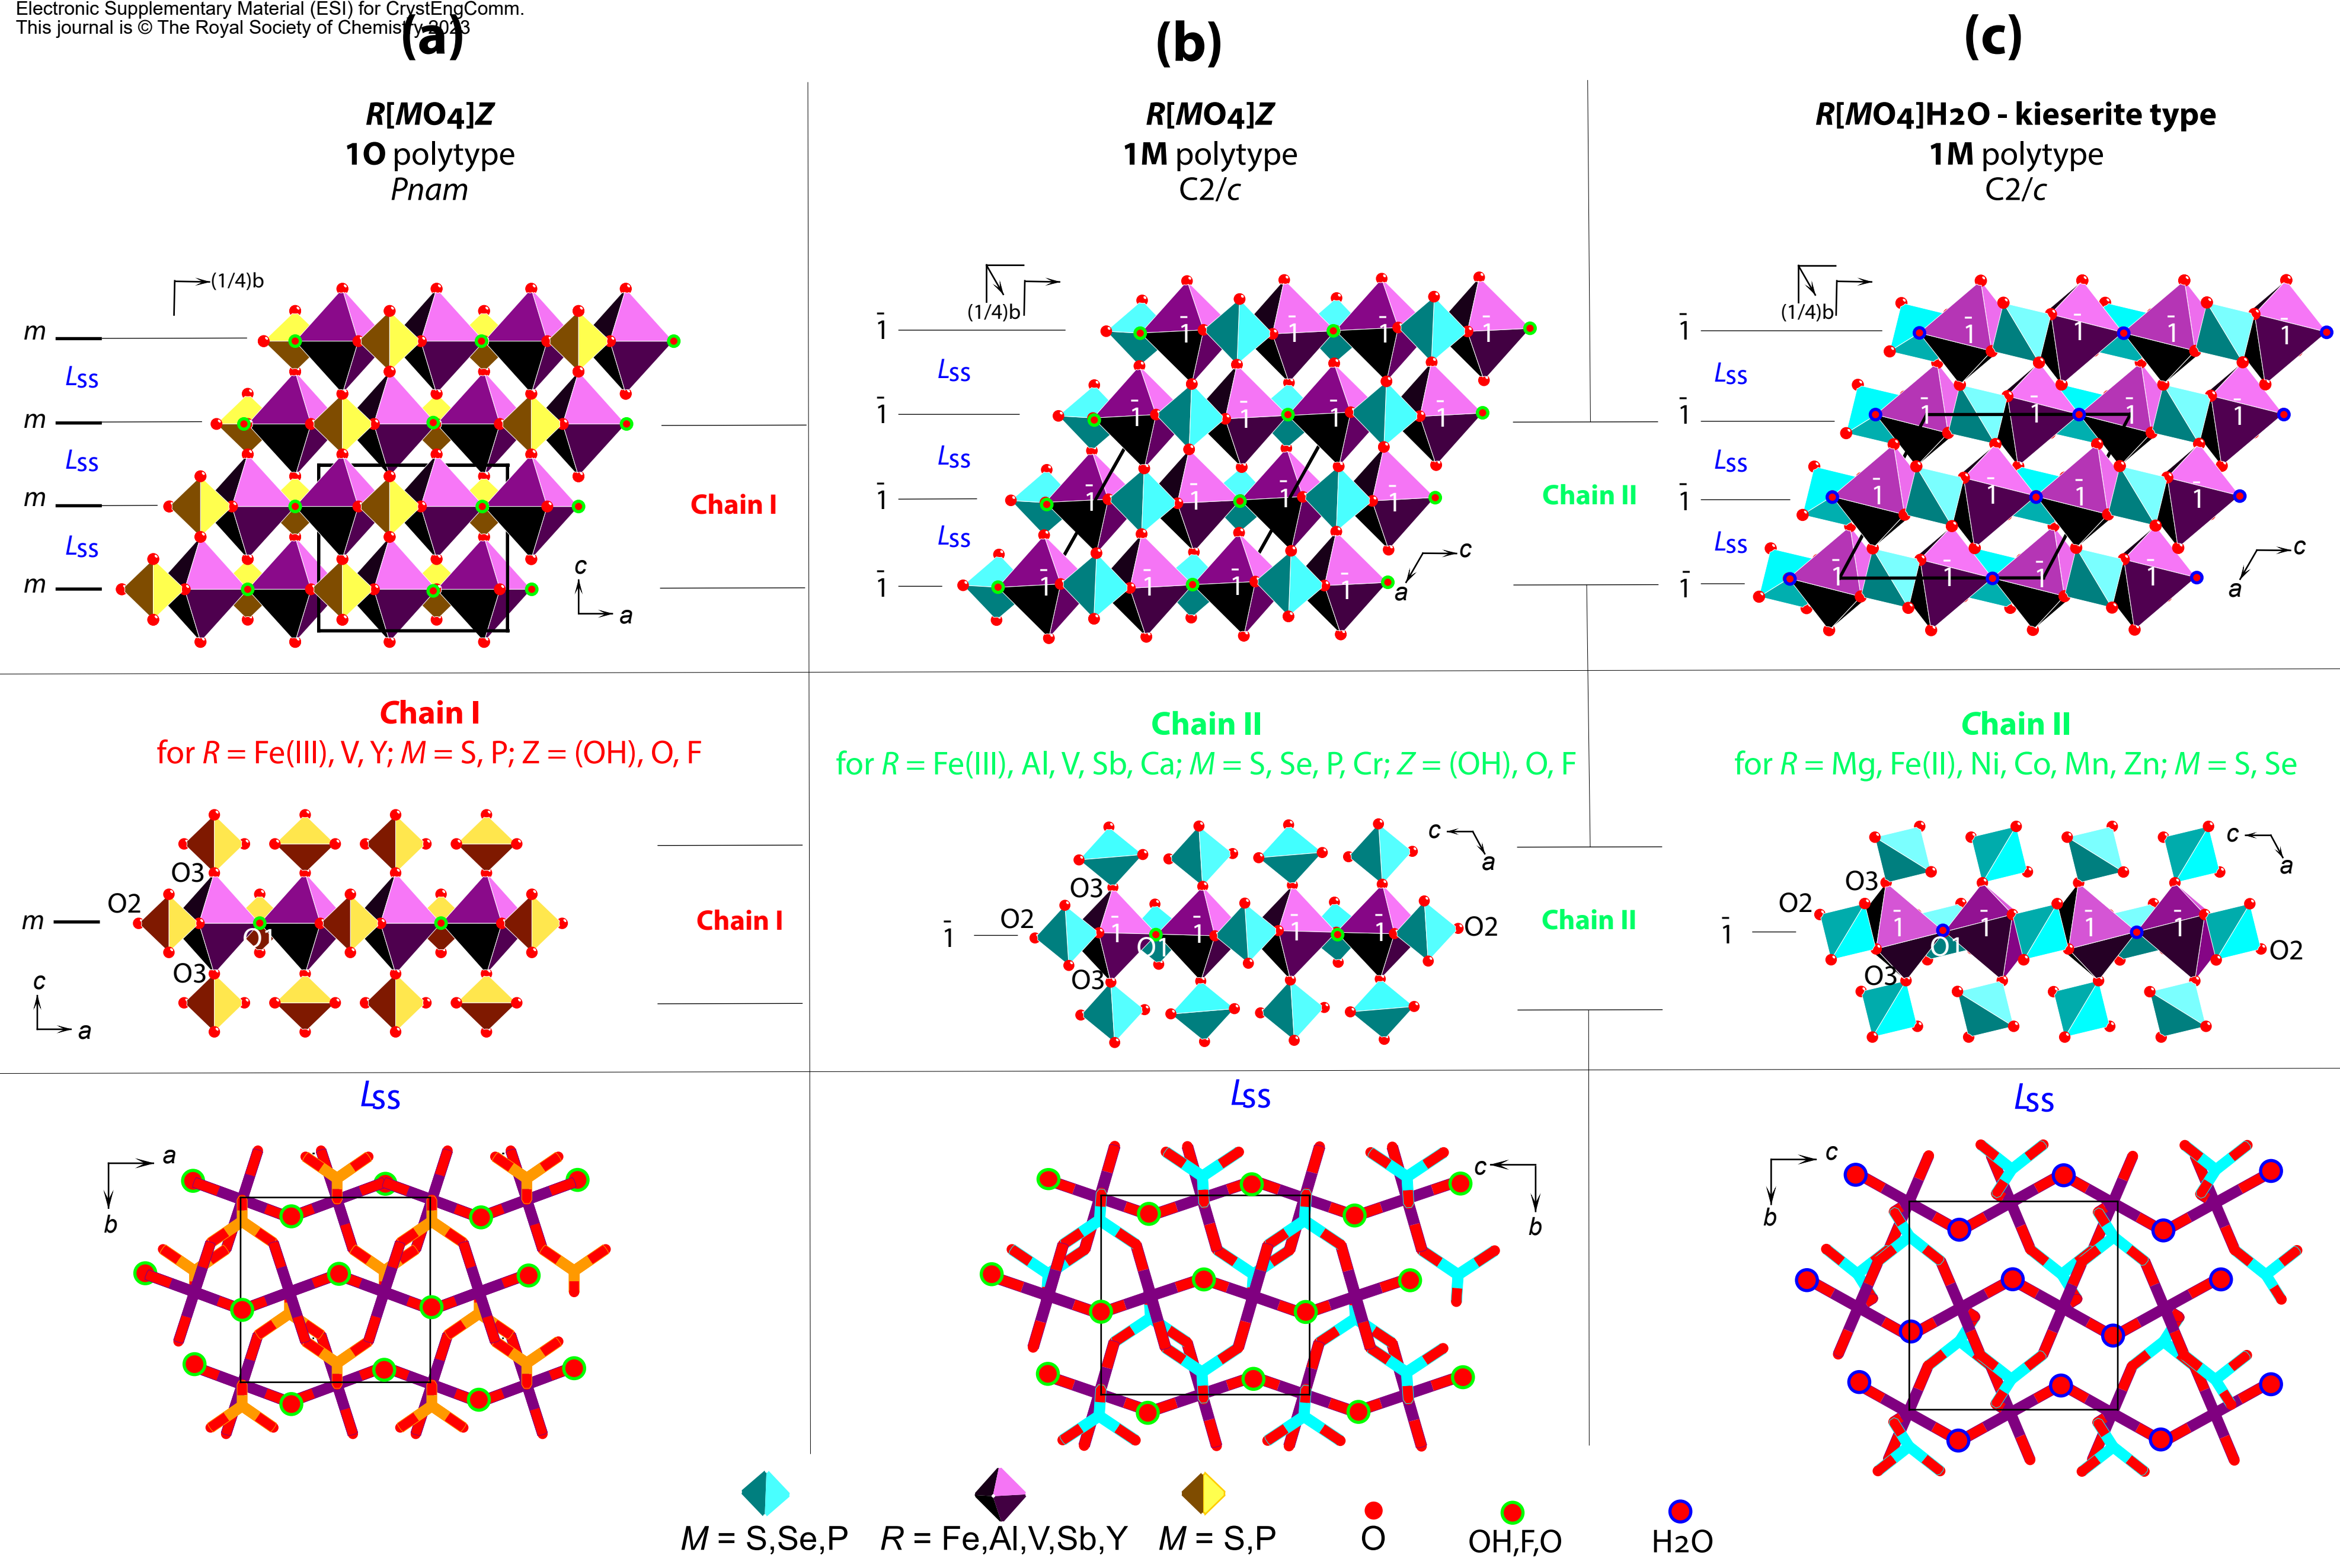

Supplement: d2ce01533a3.pdf [file d2ce01533a3.pdf]
